# Supplementary material for: Continuous Amplitude-Integrated Electroencephalographic Monitoring Is a Useful Prognostic Tool for Hypothermia-Treated Cardiac Arrest Patients
Source: PubMed Central journal article supplement — Circulation. 2015 Sep 21;132(12):1094–103. doi: 10.1161/CIRCULATIONAHA.115.015754 (PMC4572885; doi:10.1161/circulationaha.115.015754), 2015-09-21
Supplement: cir-132-1094-s001.pdf [file cir-132-1094-s001.pdf]

## **SUPPLEMENTAL MATERIAL**

**Supplemental Table 1.** Area under the TTNT curve for good neurological outcome according to the results of each neurological examination

| Neurological examination        | Test result     | Area (95% CI) under the TTNT curve for neurological outcome |
|---------------------------------|-----------------|-------------------------------------------------------------|
| Pupil light reflex<br>(n=111)   | Positive (n=44) | 0.943 (0.829-0.990)                                         |
|                                 | Negative (n=67) | 0.994 (0.934-1.000)                                         |
| Corneal reflex<br>(n=110)       | Positive (n=32) | 0.919 (0.766-0.985)                                         |
|                                 | Negative (n=78) | 0.984 (0.925-0.999)                                         |
| Spontaneous breathing<br>(n=93) | Positive (n=66) | 0.967 (0.891-0.996)                                         |
|                                 | Negative (n=27) | 1.000 (0.872-1.000)                                         |
| Motor response*<br>(n=111)      | Positive (n=23) | 1.000 (0.852-1.000)                                         |
|                                 | Negative (n=88) | 0.979 (0.923-0.998)                                         |

TTNT, time to normal trace; CI, confidence interval.

\*: Positive motor response was defined as Glasgow Coma Scale-motor grade > 2

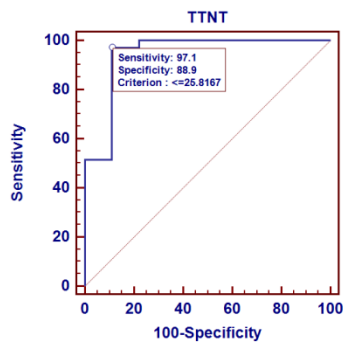

(A-1) PLR + patients (n=44)

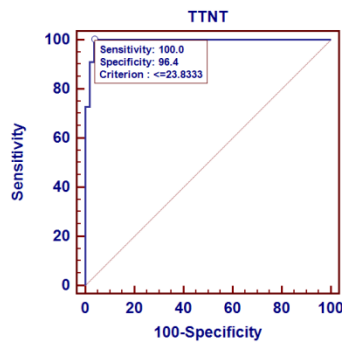

(A-2) PLR - patients (n=67)

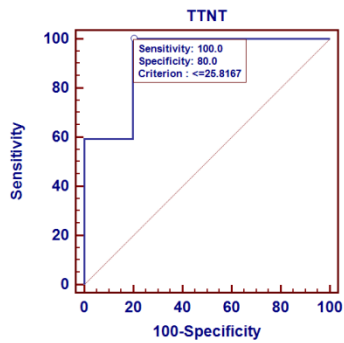

(B-1) CR + patients (n=32)

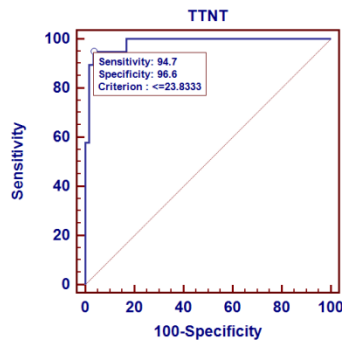

(B-2) CR - patients (n=78)

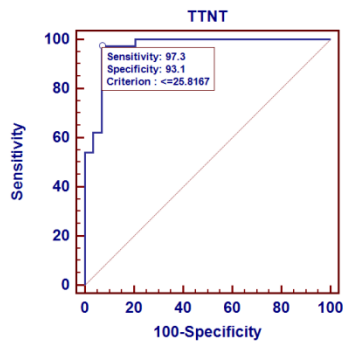

(C-1) SB + patients (n=66)

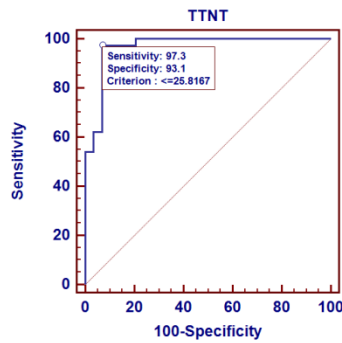

(C-2) SB - patients (n=27)

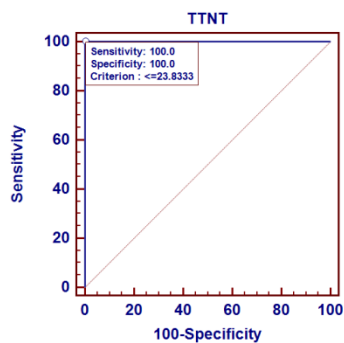

(D-1) MR + patients (n=23)

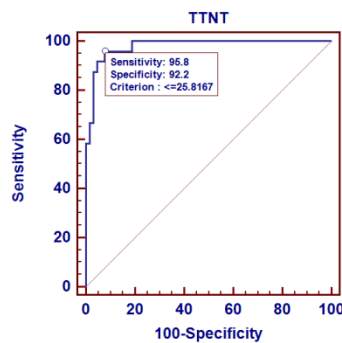

(D-2) MR - patients (n=88)

**Supplemental Figure 1.** Receiver operating characteristic curve for the prediction of neurological outcome according to the time to normal trace for each category of the initial degree of coma. PLR, pupillary light reflex; CR, corneal reflex; SB, spontaneous breathing; MR, motor response.
